# Supplementary material
Source: ML conference proceedings conference paper supplement (https://proceedings.neurips.cc/paper_files/paper/2019/hash/dc554706afe4c72a60a25314cbaece80-Abstract.html)
Supplement: Supplementary file [file dc554706afe4c72a60a25314cbaece80-Supplemental.zip]

---

# Supplementary Material for Amortized Bethe Free Energy Minimization for Learning MRFs

---

## Additional Details on Ising Model Experiments

**Inference Network Details** The  $\mathbf{h}_i, \mathbf{h}_j$  calculated by the Transformer layer were of size 200, as were the embeddings they consume. We note that if we view  $\tau_{ij}(x_i, x_j; \phi)$  as a  $2 \times 2$  matrix over the four possible events, under our parameterization we do not necessarily have that  $\tau_{ij}(x_i, x_j; \phi) = \tau_{ij}(x_j, x_i; \phi)^\top$ . We avoid this issue by calculating  $\tau_{ij}(x_i, x_j; \phi)$  only for  $i < j$  (under a row-column ordering of the  $n \times n$  grid), and then using  $\tau_{ij}(x_i, x_j; \phi)^\top$  for  $j < i$ .

## Additional Ising Model Experiments

We additionally experiment with inference in Ising models with greater interaction strength, by sampling pairwise potentials from  $\mathcal{N}(0, 3)$  and  $\mathcal{N}(0, 5)$ ; unary potentials are still sampled from  $\mathcal{N}(0, 1)$ . We show the correlations in Table 1.

Table 1: Correlations between true and approximated marginals for Ising models with greater pairwise interaction strength.

| $n$ | $\sigma = 3$ |          |          | $\sigma = 5$ |          |          |
|-----|--------------|----------|----------|--------------|----------|----------|
|     | Mean Field   | Loopy BP | Inf. Net | Mean Field   | Loopy BP | Inf. Net |
| 5   | 0.415        | 0.592    | 0.761    | 0.302        | 0.509    | 0.614    |
| 10  | 0.460        | 0.641    | 0.770    | 0.358        | 0.525    | 0.619    |
| 15  | 0.435        | 0.665    | 0.738    | 0.362        | 0.459    | 0.564    |

**Training Details** The inference network was trained with up to  $I_1 = 200$  gradient steps to minimize the BFE with respect to  $\tau$ , though optimization cut off early if the squared change in predicted pseudo-marginals was less than  $10^{-5}$ . Typically this tolerance was met after around 50 updates. Our LBP implementation was given the same budget.

## Additional Details on RBM Experiments

**Inference Network Details** We associated a 150-dimensional embedding with each node in the graph; we also embedded an indicator feature corresponding to whether a node is visible or hidden in 150 dimensional space. These embeddings were concatenated and fed into a 5-layer, 200-unit bidirectional LSTM, which consumed the embeddings first of the visible nodes, ordered row-wise, and then the hidden units. A two-layer MLP with ReLU nonlinearity was then used to predict the pseudo marginals for each edge, by consuming the corresponding top-level LSTM states.  $\lambda$  was set to 1.5. We found that using a Transformer-based inference network performed slightly worse. Whereas all non-LBP methods were given a budget of 200 random hyperparameter configurations, LBP was tuned by hand due to its exorbitant runtime.

**Training Details** We trained by doing only a single (i.e.,  $I_1 = 1$ ) update on the  $\phi$  parameters for every  $\theta$ . Using more updates typically led to faster convergence but not improved results. LBP was allowed up to 10 full sweeps over all the nodes in the graph per iteration; messages were ordered randomly. LBP was also cut off early if messages changed by less than  $10^{-3}$  on average.

## Additional Details on HMM Experiments

We again used a random search to choose the hyperparameters for each model and for each training regime that minimized held out NLL, as evaluated with a dynamic program. This search considered embeddings and hidden states of dimensionality  $\{64, 100, 150, 200\}$ , between 1 and 4 layers for the inference network, learning rates,  $\lambda$  penalties, and the random seed.

For the directed models, we obtained our best results by setting the  $e_k$  state embeddings to be 200-dimensional for the models learned with exact inference and the first-order VAE, and to be 100-dimensional for models learned with the mean field VAEs. The best word embedding sizes were 64, 100, and 64 dimensional for the first-order, baseline, and IWAE VAEs, respectively; their BLSTMS were of sizes  $3 \times 100$ ,  $3 \times 200$ , and  $2 \times 100$ , respectively.

For the undirected models, we obtained our best results by setting the  $e_k$  to be 200 for the model learned with exact inference, and 64 for the models learned with LBP and amortized BFE minimization. The best inference network used 150-dimensional word embeddings, a  $1 \times 100$  BLSTM, and  $\lambda = 1$ .

As in the RBM setting, preliminary experiments suggested that setting the penalty function  $d(\cdot, \cdot)$  to be the KL divergence slightly outperformed L2 distance, and that BLSTM inference networks slightly outperformed Transformers.

**Training Details** We trained with a batch size of 32. We again found that while we could speed up convergence by increasing  $I_1$  and  $I_2$  it did not lead to better performance.

LBP was given up to 5 full sweeps over all the nodes in the graph per iteration, but was cut off early if messages changed by less than  $10^{-3}$ . Here, unsurprisingly, we found a left-to-right ordering of messages to outperform random ordering.

All the aforementioned experiments on Ising Models, RBMs, and HMMs used Adam [1] for optimization.

## References

- [1] Diederik P Kingma and Jimmy Ba. Adam: A method for stochastic optimization. *arXiv preprint arXiv:1412.6980*, 2014.
